# Semiempirical Quantum Chemistry Model for the Lanthanides: RM1 (Recife Model 1) Parameters for Dysprosium, Holmium and Erbium

Manoel A. M. Filho<sup>1</sup>, José Diogo L. Dutra<sup>1</sup>, Gerd B. Rocha<sup>2</sup>, Alfredo M. Simas<sup>3</sup>, Ricardo O. Freire<sup>1\*</sup>

**1** Pople Computational Chemistry Laboratory, Departamento de Química, Universidade Federal de Sergipe, São Cristóvão, SE, Brazil, **2** Departamento de Química, CCEN, Universidade Federal da Paraíba, João Pessoa, PB, Brazil, **3** Departamento de Química Fundamental, Universidade Federal de Pernambuco, Recife, PE, Brazil

## Abstract

Complexes of dysprosium, holmium, and erbium find many applications as single-molecule magnets, as contrast agents for magnetic resonance imaging, as anti-cancer agents, in optical telecommunications, etc. Therefore, the development of tools that can be proven helpful to complex design is presently an active area of research. In this article, we advance a major improvement to the semiempirical description of lanthanide complexes: the Recife Model 1, RM1, model for the lanthanides, parameterized for the trications of Dy, Ho, and Er. By representing such lanthanide in the RM1 calculation as a three-electron atom with a set of 5 d, 6 s, and 6 p semiempirical orbitals, the accuracy of the previous sparkle models, mainly concentrated on lanthanide-oxygen and lanthanide-nitrogen distances, is extended to other types of bonds in the trication complexes' coordination polyhedra, such as lanthanide-carbon, lanthanide-chlorine, etc. This is even more important as, for example, lanthanide-carbon atom distances in the coordination polyhedra of the complexes comprise about 30% of all distances for all complexes of Dy, Ho, and Er considered. Our results indicate that the average unsigned mean error for the lanthanide-carbon distances dropped from an average of 0.30 Å, for the sparkle models, to 0.04 Å for the RM1 model for the lanthanides; for a total of 509 such distances for the set of all Dy, Ho, and Er complexes considered. A similar behavior took place for the other distances as well, such as lanthanide-chlorine, lanthanide-bromine, lanthanide, phosphorus and lanthanide-sulfur. Thus, the RM1 model for the lanthanides, being advanced in this article, broadens the range of application of semiempirical models to lanthanide complexes by including comprehensively many other types of bonds not adequately described by the previous models.

**Citation:** Filho MAM, Dutra JDL, Rocha GB, Simas AM, Freire RO (2014) Semiempirical Quantum Chemistry Model for the Lanthanides: RM1 (Recife Model 1) Parameters for Dysprosium, Holmium and Erbium. PLoS ONE 9(1): e86376. doi:10.1371/journal.pone.0086376

**Editor:** Dennis Salahub, University of Calgary, Canada

**Received:** October 8, 2013; **Accepted:** December 6, 2013; **Published:** January 31, 2014

**Copyright:** © 2014 Filho et al. This is an open-access article distributed under the terms of the Creative Commons Attribution License, which permits unrestricted use, distribution, and reproduction in any medium, provided the original author and source are credited.

**Funding:** This work received financial support from the Brazilian agencies, institutes and networks: CNPq, FAPITEC-SE, FACEPE (Pronex), and INAMI. The funders had no role in study design, data collection and analysis, decision to publish, or preparation of the manuscript.

**Competing Interests:** The authors have declared that no competing interests exist.

\* E-mail: rfreire@ufs.br

## Introduction

Lanthanide complexes, as is well known, have a wide range of high technology applications. Of particular importance is the discovery that, due to their slow magnetization relaxation, lanthanide mononuclear complexes may function as single-molecule magnets [1,2], the ultimate size limit for spin-based devices. Dysprosium complexes, in particular, will be very important in the development of magnetic materials because of recent results leading to the highest relaxation energy barriers for multinuclear clusters [3,4], the highest temperature at which hysteresis has been observed for any single complex [5], and a record magnetic blocking temperature of 8.3 K at a sweep rate of 0.08 Ts<sup>-1</sup> [6]. Future research, for example, might be directed towards the design of dysprosium complexes that may operate as single-molecule magnets capable of preserving their magnetization at higher and more practical temperatures [6]. Dysprosium complexes are therefore promising for optical storage and memory.

Not only that, both dysprosium and holmium complexes can also effectively function in magnetic resonance imaging, MRI, as negative contrast agents at high magnetic fields, producing darker

images, and as agents for susceptibility-induced enhancement at low magnetic fields [7]. Indeed, they are complementary to gadolinium complexes, which act as positive contrast agents, which brighten the image. Indeed, through the simultaneous applications of gadolinium and dysprosium based contrast agents to the MRI diagnosis of conditions such as ischemic heart disease, unprecedented details can now be revealed [8,9]. Future efforts will likely be intensified towards the design of such MRI contrast agents for the imaging of cellular molecular events involved in normal and pathological processes, including site specific macro-molecular and particulate delivery systems [7].

Holmium is also employed in cancer therapeutics due to the characteristics of its <sup>166</sup>Ho isotope and of its complexes, like <sup>166</sup>Ho-DOTMP which has been used in combination with chemotherapy in the treatment of myeloma because it concentrates in metastases of the skeleton and irradiates bone marrow [10].

Erbium (III) luminesces at 1.55 μm, essentially at the center of the third telecommunication window at 1.540 nm. Hence, erbium has been used in long-distance optical transmissions, power amplifiers, repeaters, etc. However, inorganic materials doped

with erbium, display a very narrow full width at half maximum [11]. In order to increase the band width, erbium complexes have been used in order to both protect the erbium ion from vibrational coupling, at the same time enhancing the absorption of light through the so-called antenna effect. Indeed, erbium complexes have been prepared that exhibit a much broader full width at half maximum of 68 nm [12], a significant broadening when compared to erbium implanted silica which has a typical value of 11 nm for its most intense peak.

Thus, the design of lanthanide complexes towards enhancement of the property of interest, while seeking to avoid eventual side effects to the health of the subject (where applicable) is an active area of research, which may largely benefit from quantum chemical tools that attempt to predict several of the physical, chemical and even pharmacological [13] properties of the conjectural new structures being considered; structures which might be sketched by assembling around the lanthanide ion, ligands, selected from a library of ligands in a combinatorial manner. And the most important information, from which

essentially all quantum chemical property predictions derive, is an accurate geometry of the molecular structure of the complex.

Predictions of geometries of lanthanide complexes from *ab initio* calculations are not so easy due not only to significant relativistic effects, a consequence of their high atomic numbers, but also to the complex manifold of microstates due, not only to a partially filled f-shell, but also from possibly partially filled 5 d 6 s and 6 p shells [14]. Therefore, full geometry optimizations from such first principles calculations are essentially unfeasible for the technologically useful complexes, which usually exhibit sizes of the order of 100 atoms or more. As a consequence, effective core potentials arise as a practical and very efficient manner of circumventing the complexity, while retaining important characteristics of *ab initio* calculations. Of these, the most widely used are the relativistic pseudopotentials of Dolg [15,16] which represent an excellent compromise between accuracy and usage of computational resources, mainly computing time. So far, the most thorough study of the geometry prediction accuracy of these relativistic potentials has been carried out by our research group in 2006 when full geometry optimizations were carried out on 52 different lanthanide complexes, including complexes of dysprosium (III), holmium (III) and erbium (III). [17] The counterintuitive results obtained indicated that the best combination of method with basis set when using the MWB pseudopotential was RHF/STO-3G when the intent of the calculation was to predict the geometry of the coordination polyhedron – very important for any subsequent ligand field application. Moreover, either increasing the basis set, or adding electron correlation, only worsened the quality of the resulting coordination polyhedron. On the other hand, although the quality of the obtained coordination polyhedron via RH/STO-3G was very good, that could not be said of the geometry of the attached organic ligands.

In 1994, we introduced the Sparkle Model for the calculation of lanthanide complexes [18,19], a semiempirical model within the framework of the AM1 semiempirical model [20], which replaced the lanthanide ion by a +3e charge, with the corresponding Coulomb field superimposed to a repulsive potential of the form  $\exp(-\alpha r)$ , with  $\alpha$  being a parameter designed to somewhat delineate the size of the lanthanide ion, preventing the implosion of the ligands towards it. A very useful method of obtaining absorption spectra of lanthanide complexes was subsequently published [21]. Later [22], Gaussians were added to the core-core repulsion of the sparkle-ligand atom to make the Sparkle Model more consistent with the AM1. In 2005, based on a parameterization scheme employed for europium, gadolinium and terbium [23], the first useful and accurate semiempirical model for dysprosium was defined [24], followed by holmium [25]; and in 2006 for erbium [26]. These models were defined for AM1, and became later available in MOPAC2007 [27], the overall model being called Sparkle/AM1. So far, most applications of the Sparkle Model are related to luminescence research [28–30]. But since different semiempirical models possess different accuracies and eventually develop particular niches of applications, it soon became a necessity to extend the Sparkle Model to others, giving rise to Sparkle/PM3 [31,32], Sparkle/PM6 [33], Sparkle/PM7 [34], targeted to solids, and Sparkle/RM1 [35].

However, none of the above mentioned Sparkle Models attaches semiempirical atomic orbitals to the lanthanide ion. Nevertheless, these models are all very accurate to describe lanthanide-ligand atom distances when the coordinating atom of the ligands is another lanthanide, oxygen or nitrogen. By moving towards other types of lanthanide-ligand atom bonds, however, the accuracy of the Sparkle Models starts to wane. All that points out to the fact that there is some degree of overlap between the orbitals

**Table 1.** Parameters\* for the RM1 model for the trications of Dy, Ho and Er.

| RM1                           |                  |                  |                  |  |
|-------------------------------|------------------|------------------|------------------|--|
| Parameter Unit                | Dy <sup>3+</sup> | Ho <sup>3+</sup> | Er <sup>3+</sup> |  |
| $U_{ss}$ eV                   | −20.92623973     | −22.05745867     | −21.97839904     |  |
| $U_{pp}$ eV                   | −7.66730575      | −7.59563761      | −7.60784986      |  |
| $U_{dd}$ eV                   | −17.94081525     | −18.00040589     | −17.97684107     |  |
| $\zeta_s$ bohr <sup>−1</sup>  | 1.29527540       | 1.33055043       | 1.34775672       |  |
| $\zeta_p$ bohr <sup>−1</sup>  | 1.91210659       | 1.77955939       | 1.80648084       |  |
| $\zeta_d$ bohr <sup>−1</sup>  | 1.41339670       | 1.53652417       | 1.46618905       |  |
| $\beta_s$ eV                  | −7.60670536      | −5.64522644      | −5.63471034      |  |
| $\beta_p$ eV                  | 1.96173362       | 0.00653676       | −0.01897203      |  |
| $\beta_d$ eV                  | −4.36852734      | −4.31289917      | −4.25067889      |  |
| $F_{sd}^0$ eV                 | 8.30543139       | 8.24056943       | 8.25732681       |  |
| $G_{sd}^2$ eV                 | 1.31036509       | 1.24543189       | 1.24874510       |  |
| $\rho_{core}$ bohr            | 1.62505501       | 1.71955962       | 2.71713627       |  |
| $\alpha$ Å <sup>−1</sup>      | 1.34825876       | 1.33007543       | 1.32010273       |  |
| $\zeta'_s$ bohr <sup>−1</sup> | 1.37236617       | 1.49803844       | 1.44675714       |  |
| $\zeta'_p$ bohr <sup>−1</sup> | 1.07407253       | 1.96749739       | 1.97388315       |  |
| $\zeta'_d$ bohr <sup>−1</sup> | 0.81914360       | 0.66302146       | 0.65046083       |  |
| $a_1$ none                    | 1.13071544       | 1.09070756       | 1.17417665       |  |
| $b_1$ Å <sup>−2</sup>         | 7.71195583       | 7.57151625       | 7.58325164       |  |
| $c_1$ Å                       | 1.53665819       | 1.49095411       | 1.50354881       |  |
| $a_2$ none                    | 0.06845575       | 0.00141941       | 0.00864571       |  |
| $b_2$ Å <sup>−2</sup>         | 7.50653990       | 7.79969636       | 7.81378785       |  |
| $c_2$ Å                       | 3.23417102       | 3.25425084       | 3.23359665       |  |

All these parameters are as defined in the formalisms and equations of the RM1 model.

\*Parameters are  $s$ ,  $p$ , and  $d$  atomic orbital one-electron one-center integrals  $U_{ss}$ ,  $U_{pp}$  and  $U_{dd}$ ; the  $s$ ,  $p$ , and  $d$  Slater atomic orbital exponents  $\zeta_s$ ,  $\zeta_p$ , and  $\zeta_d$ ; the  $s$ ,  $p$ , and  $d$  atomic orbital one-electron two-center resonance integral terms  $\beta_s$ ,  $\beta_p$ , and  $\beta_d$ ; the core-core repulsion term  $\alpha$ ; the two-electron integrals  $F_{sd}^0$ ,  $G_{sd}^2$ ; and the additive term  $\rho_{core}$  needed to evaluate core-electron and core-core nuclear interactions; the second set of exponents to compute the one-center integrals  $\zeta'_s$ ,  $\zeta'_p$ , and  $\zeta'_d$ ; and the six parameters for the two Gaussian functions: height,  $a_i$ ; inverse broadness,  $b_i$ ; and displacement,  $c_i$ .

doi:10.1371/journal.pone.0086376.t001

**Table 2.** Unsigned mean errors,  $UME_{(Dy-L)}S$  and  $UMEs$ , for the RM1 model for the lanthanides, as compared to the respective experimental crystallographic values, obtained from the Cambridge Structural Database, [37–39] for each of the 61 dysprosium (III) complexes.

| Complex* | RM1                 |         | Complex* | RM1                 |         |
|----------|---------------------|---------|----------|---------------------|---------|
|          | $UME_{(Dy-L)}S$ (Å) | UME (Å) |          | $UME_{(Dy-L)}S$ (Å) | UME (Å) |
| AMAQDY   | 0.0517              | 0.1503  | AKUKAT   | 0.0216              | 0.1148  |
| BAFZUE   | 0.0470              | 0.1129  | BEXLIA   | 0.0300              | 0.0972  |
| BIHLIN   | 0.0317              | 0.0719  | DANPEN   | 0.0410              | 0.0953  |
| BUVXIZ01 | 0.0658              | 0.0872  | DEKBEB   | 0.0438              | 0.0832  |
| CECLIF   | 0.0522              | 0.0959  | DEKBEB01 | 0.0370              | 0.0843  |
| CECLIF10 | 0.0521              | 0.0960  | DEKCAY01 | 0.0632              | 0.1068  |
| DIBTIR   | 0.0313              | 0.0977  | DUFCOW10 | 0.0348              | 0.1042  |
| DIDBOH   | 0.0417              | 0.1567  | FIGXEZ   | 0.0327              | 0.1403  |
| FOPNAZ   | 0.0138              | 0.1471  | FUXPAP01 | 0.1191              | 0.1026  |
| FUXRAR   | 0.0401              | 0.1662  | HIVWEP   | 0.0665              | 0.1222  |
| GAKYEW   | 0.0258              | 0.1273  | HOCYUU   | 0.0942              | 0.0976  |
| GINPUO   | 0.0455              | 0.0813  | IMOXAJ   | 0.0271              | 0.1036  |
| HANCAA   | 0.0553              | 0.1424  | KILZOU02 | 0.0487              | 0.1307  |
| KITGEZ   | 0.0480              | 0.1391  | KUYBIP   | 0.1338              | 0.1260  |
| LEYHUS   | 0.0296              | 0.2200  | LEZZOG   | 0.0343              | 0.0741  |
| MANHOY   | 0.0804              | 0.1208  | MECCUT   | 0.0408              | 0.1836  |
| PALBIN   | 0.0205              | 0.4919  | NAKMAO   | 0.0323              | 0.0713  |
| QQQEMM01 | 0.0328              | 0.0841  | NAPHAN   | 0.0377              | 0.0883  |
| SETADY   | 0.0883              | 0.2516  | OHUYUM   | 0.0286              | 0.0985  |
| TISQUH   | 0.0670              | 0.1240  | RABBEX   | 0.0825              | 0.2034  |
| TUQTUU   | 0.0601              | 0.0940  | ROCTIN   | 0.1118              | 0.2276  |
| TUQTUU01 | 0.0601              | 0.0943  | TESHEF   | 0.0348              | 0.1448  |
| VOSBOU   | 0.0587              | 0.0879  | TESHOP   | 0.0571              | 0.1010  |
| XAWVIA   | 0.0408              | 0.1087  | TESJEH   | 0.0356              | 0.1150  |
| XEQMAH   | 0.0987              | 0.1019  | TESJIL   | 0.0564              | 0.1008  |
| XIVFUD   | 0.1015              | 0.2004  | USEPEO   | 0.0484              | 0.1090  |
| YAVSOD   | 0.0432              | 0.0726  | WAQZEU   | 0.1499              | 0.1742  |
| ZAXSAS   | 0.0700              | 0.1357  | WAWJOT01 | 0.1152              | 0.1538  |
| ZZZARG01 | 0.0602              | 0.0897  | WEDHUJ   | 0.0282              | 0.1089  |
| AGUTOL   | 0.0719              | 0.1019  | XAYRIZ   | 0.0416              | 0.0874  |
| AHANED   | 0.0817              | 0.1433  |          |                     |         |

\*The complexes are identified by their unique CSD codes [37–39].  
doi:10.1371/journal.pone.0086376.t002

of the lanthanide and those of the coordinating atoms – in short, there is a degree of covalence not taken into account by the Sparkle Model.

In this article, in order to considerably broaden the range of applications of semiempirical methods for lanthanide complexes, we introduce a new model with orbitals for the lanthanide trications of dysprosium, holmium, and erbium, within RM1 [36], which we call simply RM1 model for the lanthanides, a significantly more general model, not to be confused with Sparkle/RM1 [35] which does not have orbitals associated with the lanthanide ion.

**Table 3.** Unsigned mean errors,  $UME_{(Ho-L)}S$  and  $UMEs$ , for the RM1 model for the lanthanides, as compared to the respective experimental crystallographic values, obtained from the Cambridge Structural Database, [37–39] for each of the 40 holmium (III) complexes.

| Complex* | Method RM1          |         | Complex* | Method RM1          |         |
|----------|---------------------|---------|----------|---------------------|---------|
|          | $UME_{(Ho-L)}S$ (Å) | UME (Å) |          | $UME_{(Ho-L)}S$ (Å) | UME (Å) |
| BAGBAN   | 0.0513              | 0.1131  | XARVOB   | 0.0363              | 0.0912  |
| BEYSAZ   | 0.0529              | 0.1976  | XAWVOG   | 0.0530              | 0.0930  |
| BUVXOF01 | 0.0634              | 0.0869  | XEQMEL   | 0.0843              | 0.0602  |
| CAQFUV   | 0.0676              | 0.0790  | XEWVIE   | 0.0696              | 0.1305  |
| COZHEE   | 0.0223              | 0.0966  | XORGEQ   | 0.0362              | 0.4482  |
| CUSYUK   | 0.0483              | 0.2318  | AGUVED   | 0.0443              | 0.0838  |
| ECOJEL   | 0.0975              | 0.1573  | AXAZAA   | 0.0893              | 0.1137  |
| FAGYOC   | 0.0695              | 0.3482  | DEKBAX   | 0.0378              | 0.0768  |
| GAKYIA   | 0.0462              | 0.1312  | DEKBOL   | 0.1163              | 0.1557  |
| GINREA   | 0.0460              | 0.0775  | EWIPUV   | 0.0365              | 0.1275  |
| GODKOZ   | 0.0358              | 0.0523  | FUXRIZ   | 0.0742              | 0.0715  |
| HANCII   | 0.0196              | 0.0593  | GIFLIQ   | 0.1142              | 0.1489  |
| HOESUL02 | 0.0621              | 0.0916  | MOGWUB   | 0.4893              | 0.6047  |
| KITGOJ   | 0.0254              | 0.0773  | MUHWIW   | 0.0491              | 0.0888  |
| LEYJEE   | 0.0413              | 0.1874  | NUFQAG   | 0.0399              | 0.0715  |
| LIZPAL   | 0.0499              | 0.2272  | NUYNOL   | 0.0689              | 0.0652  |
| NIHRIF   | 0.0640              | 0.1070  | NUYNOL01 | 0.0484              | 0.0764  |
| NUJBAB   | 0.0087              | 0.0625  | QELLOJ   | 0.0493              | 0.0937  |
| QOZVOQ   | 0.0185              | 0.1002  | QIVYAW   | 0.0423              | 0.0620  |
| SIFZIQ   | 0.0273              | 0.1721  | YEFVUA   | 0.0349              | 0.0760  |

\*The complexes are identified by their unique CSD codes [37–39].  
doi:10.1371/journal.pone.0086376.t003

## Methods

The rationale of the RM1 model for the lanthanides starts with the following electron configuration for the lanthanide atoms:  $\{[Xe]4f^n\}5d^1 6s^2$ , with  $n=9, 10, 11$  for Dy, Ho and Er, respectively. The semiempirical core of the atoms then becomes  $\{[Xe]4f^n\}$ . The semiempirical valence shells will now have three electrons and will be described by 5 d, 6 s and 6 p orbitals, for a total of 9 orbitals. Hence the model will work for trications only, because for dications there would be a need to parameterize another core of the form  $\{[Xe]4f^{n+1}\}$  and assign two electrons to the valence shells, although they could still be described by another set of 5 d, 6 s, and 6 p orbitals. Since trications are by far the most common form of lanthanide ions, as before, we expect the present parameterization to be able to tackle essentially all cases relevant to technological applications.

The next step is to define the universes of complexes, one universe for each of the lanthanide ions under consideration. Accordingly, we selected from the Cambridge Crystallographic Database [37–39] all available complexes of high crystallographic quality ( $R < 0.05$ ), for a total of 61 of Dy(III), 40 of Ho(III), and 50 of Er(III).

We then proceeded to select sub-sets of complexes, the parameterization sets, according to some metric capable of guaranteeing that these sub-sets are representative of the universe of complexes with respect to some accuracy measure. Assuming

**Table 4.** Unsigned mean errors,  $UME_{(Er-L)}s$  and  $UMEs$ , for Method RM1, as compared to the respective experimental crystallographic values, obtained from the Cambridge Structural Database, [37–39] for each of the 59 erbium (III) complexes.

| Complex* | Method RM1             |            | Complex* | Method RM1             |            |
|----------|------------------------|------------|----------|------------------------|------------|
|          | $UME_{(Er-L)}s$<br>(Å) | UME<br>(Å) |          | $UME_{(Er-L)}s$<br>(Å) | UME<br>(Å) |
| AERETS02 | 0.0563                 | 0.0895     | RIKTEK   | 0.0522                 | 0.2208     |
| AKIYEE   | 0.0440                 | 0.2700     | RIKTEK01 | 0.0488                 | 0.2197     |
| BAGBER   | 0.0462                 | 0.1076     | ROCSOS   | 0.0782                 | 0.2444     |
| BEXLEW   | 0.0842                 | 0.1678     | ROCTOT   | 0.0595                 | 0.2138     |
| BOBWAQ   | 0.0421                 | 0.1184     | RUNQOG   | 0.0513                 | 0.1022     |
| BODMUD   | 0.0388                 | 0.1382     | SEGVAB   | 0.0691                 | 0.1681     |
| BOWXOA   | 0.0450                 | 0.1848     | SOKBID   | 0.0280                 | 0.0513     |
| DEKCEC   | 0.0371                 | 0.0914     | TACERB01 | 0.0262                 | 0.0958     |
| DIBTAJ   | 0.0369                 | 0.1778     | TEJFEU   | 0.1355                 | 0.2048     |
| DIDCAU   | 0.0399                 | 0.2601     | TEPKOO   | 0.0297                 | 0.0715     |
| DIJQAO   | 0.0391                 | 0.2332     | TMHDER   | 0.0588                 | 0.3224     |
| DIJQIW   | 0.0310                 | 0.1024     | TUMJEQ   | 0.0583                 | 0.1227     |
| DIYNII   | 0.0260                 | 0.1158     | UFIRIK   | 0.0622                 | 0.0716     |
| DOGKEP   | 0.0323                 | 0.1502     | VEQFOM   | 0.0820                 | 0.0617     |
| GAKYOG   | 0.0266                 | 0.1057     | VOSNOG   | 0.0375                 | 0.0833     |
| GINRIE   | 0.0464                 | 0.0807     | VUSGUL   | 0.0817                 | 0.0941     |
| HANCOO   | 0.0165                 | 0.0609     | VUSHEW   | 0.0593                 | 0.1107     |
| HEDVIW   | 0.1052                 | 0.1989     | WEFVIM   | 0.0466                 | 0.0843     |
| HENAEB   | 0.0283                 | 0.1548     | XAXYAX   | 0.0593                 | 0.0854     |
| KITGUP   | 0.0149                 | 0.0729     | XEWWOK   | 0.0442                 | 0.1163     |
| KOZBUW   | 0.0144                 | 0.0561     | XEWWUR   | 0.0472                 | 0.0938     |
| LEYJII   | 0.0294                 | 0.2276     | XOVHAS   | 0.0851                 | 0.2268     |
| MAGDOP   | 0.0449                 | 0.1319     | XOYXIS   | 0.0285                 | 0.1590     |
| MECDEE   | 0.0281                 | 0.0853     | YEGFEV   | 0.0504                 | 0.1687     |
| NIVQUE   | 0.0499                 | 0.2188     | YEMSIT   | 0.0767                 | 0.1338     |
| NUYNUR   | 0.0838                 | 0.2163     | YICCIW   | 0.0344                 | 0.1527     |
| OHUZEX   | 0.0269                 | 0.0890     | YUFWIG   | 0.0196                 | 0.0988     |
| OMATUS   | 0.0742                 | 0.1597     | ZADWUW   | 0.1281                 | 0.2265     |
| QIVXID   | 0.0742                 | 0.2170     | ZUFSAU   | 0.0480                 | 0.1304     |
| RELNIG   | 0.0530                 | 0.1011     |          |                        |            |

\*The complexes are identified by their unique CSD codes [37–39].  
doi:10.1371/journal.pone.0086376.t004

that any difficulties Sparkle/AM1 might be having in describing the coordination polyhedron of the complexes is a reasonable first order approximation to the eventual overall difficulty which the present model will encounter, we defined the following  $R_i$  metric for each one of the  $i$  complexes of the universe for each lanthanide trication:

$$R_i = \sum_j \sum_k \frac{1}{\sigma_j^{dist}} |d_{i,j,k}^{CSD} - d_{i,j,k}^{Calc}| + \sum_l \frac{1}{\sigma_l^{angle}} |\theta_{i,l}^{CSD} - \theta_{i,l}^{Calc}| \quad (1)$$

where  $j$  runs over all types of bonds, e.g. Ln-N, Ln-O, Ln-C, Ln-S, Ln-P, etc;  $k$ , runs over all bonds of type  $j$ ;  $\sigma_j^{dist}$  is the standard deviation of all crystallographic bond lengths of type  $j$  for all

complexes of the universe;  $d_{i,j,k}^{CSD}$  is the crystallographic  $k^{th}$  bond distance of type  $j$  for complex  $i$ ;  $d_{i,j,k}^{Calc}$  is the calculated value of the same bond;  $\sigma^{angle}$  is the standard deviation of all crystallographic bond angles of the type A-Ln-B, with A,B = O, N, C, S, Cl, and Br;  $\theta_{i,l}^{exp}$  is the crystallographic  $l^{th}$  bond angle of complex  $i$ ; and  $\theta_{i,l}^{Calc}$  is its calculated counterpart. The standard deviations were calculated from the experimental data only. We also found out that there was no need to split the angles into types, as they all formed a homogeneous set. The divisions of the errors by their corresponding standard deviations make sure that the summations in Eq. (1) add comparable terms. To the set of  $R_i$  values, each one associated with a different complex, we employed a hierarchical clustering analysis DIANA [40]. DIANA starts out with one large cluster containing all complexes. In the subsequent steps, the complexes that are the most dissimilar are split off into smaller clusters – a procedure which continues until each complex forms a cluster of itself. From the resulting dendrogram, we chose two sets of complexes as parameterization sets: a smaller and a larger one. For Dy(III) these sets contained 13 and 26 complexes, respectively. The corresponding numbers for Ho(III) were 12 and 20, and for Er(III) 16, and 39.

The parameterization was carried out to minimize the sum of  $R_i$ s for all complexes of parameterization set, with the difference that the calculated distances and angles in Eq. (1), are now the ones calculated by the model being parameterized. For the parameterization, we used a combination of Simplex and generalized simulated annealing [41] algorithms. We started with the smaller parameterization sets. Once these preliminary optimizations converged, we then expanded the parameterization sets to the larger ones and repeated the process until termination. Table 1 presents the final optimized parameters.

## Results and Discussion

In order to evaluate the quality of the optimized parameters, we devised two measures [23,42]. Both are based on the following formula:

$$UME_i = \frac{1}{n} \sum_{j=1}^n |R_{i,j}^{CSD} - R_{i,j}^{RM1}| \quad (2)$$

where UME stands for unsigned mean error;  $i$  refers to a given complex;  $n$  is the number of distances taken into consideration in the given complex; the superscript CSD indicates that the distance  $R$  is an experimental crystallographic distance taken from CSD, and the superscript RM1 means that the distance was calculated from the present model. In the first measure we consider only

**Table 5.** Means and variances for the  $\gamma$  distribution fits of the  $UME_{(Ln-L)}s$  computed for the  $N$  complexes for each lanthanide trication.

| $UME_{(Ln-L)}s$  |    |          |                            |         |
|------------------|----|----------|----------------------------|---------|
| Lanthanide ion   | N  | mean (Å) | variance (Å <sup>2</sup> ) | p-value |
| Dy <sup>3+</sup> | 61 | 0.0539   | 0.0032                     | 0.7986  |
| Ho <sup>3+</sup> | 40 | 0.0602   | 0.0069                     | 0.1292  |
| Er <sup>3+</sup> | 58 | 0.0506   | 0.0025                     | 0.9082  |

doi:10.1371/journal.pone.0086376.t005

**Table 6.** Means and variances for the  $\gamma$  distribution fits for the UMEs computed for the  $N$  complexes for each lanthanide trication.

| UMEs             |    |                       |                             |         |
|------------------|----|-----------------------|-----------------------------|---------|
| Lanthanide ion   | N  | mean ( $\text{\AA}$ ) | variance ( $\text{\AA}^2$ ) | p-value |
| Dy <sup>3+</sup> | 61 | 0.1193                | 0.0169                      | 0.1578  |
| Ho <sup>3+</sup> | 40 | 0.1225                | 0.0290                      | 0.1463  |
| Er <sup>3+</sup> | 58 | 0.1348                | 0.0228                      | 0.5425  |

doi:10.1371/journal.pone.0086376.t006

distances between the central lanthanide ion and its directly coordinating atom distances, which we call  $UME_{(Ln-L)}$ . In the second measure, which we call simply UME, we consider not only the lanthanide ion-directly coordinating atoms as before, but also all distances between all atoms of the coordinating polyhedron, thus indirectly taking into account the angles within the coordination polyhedron.

Tables 2–4 present  $UME_{(Ln-L)}$ s and UMEs for the universe set of complexes for each of the lanthanide trications: Dy(III), Ho(III), and Er(III), identified by their respective CSD codes.

We now proceed to the statistical validation of the model [43]. If the parameterizations captured the essence of the coordinating bonds, then the histograms of both  $UME_{(Ln-L)}$  and UME must follow gamma distribution functions since, by definition, the UMEs can only have positive values. The gamma distributions are then adjusted to reproduce the mean and variance of the  $UME_{(Ln-L)}$ s, for each of the parameterized trications. Finally, the qualities of the gamma distribution fits of the data were then assessed via the one-sample nonparametric Kolmogorov-Smirnoff test [44]. If the p-value of the test is larger than 0.05, then the gamma distribution fit is justified within a 95% interval and the use of the mean and variance of the data, as accuracy measures, is also statistically justified. Accordingly, Tables 5 and 6 display the mean, variance, and p-value of the test for each of the lanthanide ions, for both the  $UME_{(Ln-L)}$ s and UMEs. All p-values are substantially larger than 0.05 and, therefore, the means and variances in Tables 5 and 6 can justifiably be taken as accuracy measures of the models for Dy(III), Ho(III), and Er(III).

We now proceed to analyze the performance of the models with respect to specific types of distances for Dy(III), Ho(III), and

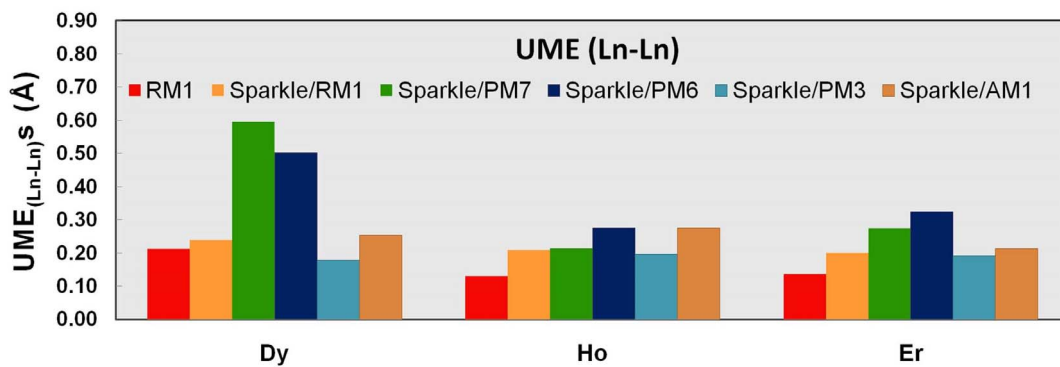

**Figure 1.**  $UME_{(Ln-Ln)}$ s obtained using the RM1 model for the lanthanides and all five versions of the Sparkle Model: Sparkle/RM1, Sparkle/PM7, Sparkle/PM6, Sparkle/PM3 and Sparkle/AM1 for all complexes of the universe set for each of the lanthanide trications: Dy(III), Ho(III) and Er(III). The UMEs are calculated as the absolute value of the difference between the experimental and calculated Ln-Ln interatomic distances, summed up for all complexes, for each of the lanthanides.

doi:10.1371/journal.pone.0086376.g001

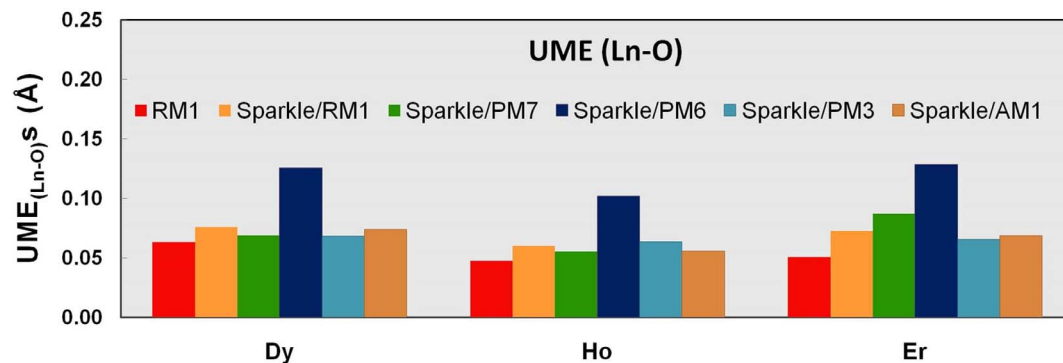

**Figure 2.**  $UME_{(Ln-O)}$ s obtained using the RM1 model for the lanthanides and all five versions of the Sparkle Model: Sparkle/RM1, Sparkle/PM7, Sparkle/PM6, Sparkle/PM3 and Sparkle/AM1 for all complexes of the universe set for each of the lanthanide trications: Dy(III), Ho(III) and Er(III). The UMEs are calculated as the absolute value of the difference between the experimental and calculated Ln-O interatomic distances, summed up for all complexes, for each of the lanthanides.

doi:10.1371/journal.pone.0086376.g002



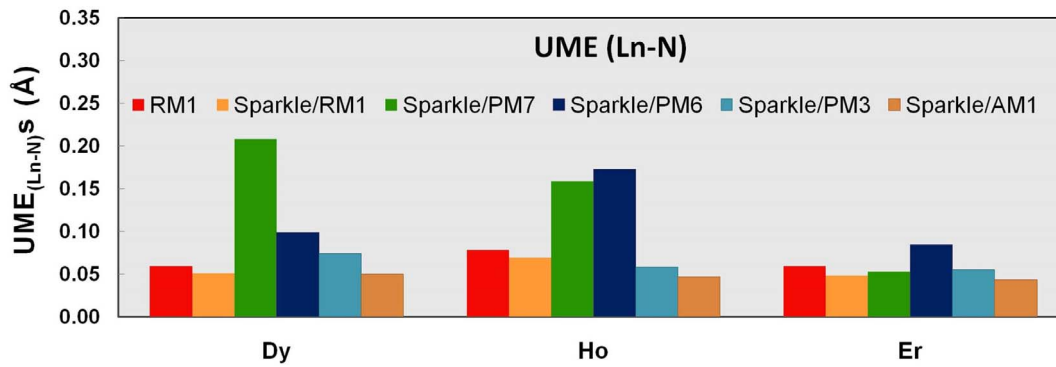

**Figure 3.**  $UME_{(Ln-N)}$ s obtained using the RM1 model for the lanthanides and all five versions of the Sparkle Model: Sparkle/RM1, Sparkle/PM7, Sparkle/PM6, Sparkle/PM3 and Sparkle/AM1 for all complexes of the universe set for each of the lanthanide trications: Dy(III), Ho(III) and Er(III). The UMEs are calculated as the absolute value of the difference between the experimental and calculated Ln-N interatomic distances, summed up for all complexes, for each of the lanthanides.  
doi:10.1371/journal.pone.0086376.g003

**Table 7.** RM1, Sparkle/RM1, Sparkle/PM7, Sparkle/PM6, Sparkle/PM3, and Sparkle/AM1 unsigned mean errors for different types of distances of dysprosium(III) complexes.

| Type of distances    | unsigned mean errors for specific types of distances (Å) |               |             |             |             |               |               |
|----------------------|----------------------------------------------------------|---------------|-------------|-------------|-------------|---------------|---------------|
|                      | N                                                        | RM1           | Sparkle/RM1 | Sparkle/PM7 | Sparkle/PM6 | Sparkle/PM3   | Sparkle/AM1   |
| Dy - Dy              | 16                                                       | 0.2118        | 0.2397      | 0.5950      | 0.5025      | <b>0.1784</b> | 0.2531        |
| Dy - O               | 283                                                      | <b>0.0637</b> | 0.0760      | 0.0692      | 0.1259      | 0.0685        | 0.0740        |
| Dy - N               | 105                                                      | 0.0594        | 0.0510      | 0.2084      | 0.0992      | 0.0741        | <b>0.0500</b> |
| Dy - C               | 315                                                      | <b>0.0341</b> | 0.1854      | 0.2567      | 0.4616      | 0.2346        | 0.2161        |
| Dy - S               | 21                                                       | <b>0.0824</b> | 0.5016      | 0.9833      | 0.5359      | 0.4996        | 0.5019        |
| Dy - P               | 3                                                        | <b>0.0273</b> | 0.1591      | 2.3194      | 0.3934      | 0.4205        | 0.3918        |
| Dy - Cl              | 20                                                       | <b>0.0525</b> | 0.2858      | 0.1757      | 0.2318      | 0.2475        | 0.2546        |
| Dy - Br              | 5                                                        | <b>0.0311</b> | 0.4564      | 1.3418      | 0.3986      | 0.4209        | 0.4320        |
| Dy - L               | 768                                                      | <b>0.0539</b> | 0.1408      | 0.2209      | 0.2846      | 0.1598        | 0.1527        |
| L-L'                 | 3499                                                     | <b>0.1336</b> | 0.2370      | 0.2931      | 0.3449      | 0.2433        | 0.2621        |
| Dy-L, Dy-Dy and L-L' | 4267                                                     | <b>0.1193</b> | 0.2197      | 0.2801      | 0.3341      | 0.2283        | 0.2424        |

doi:10.1371/journal.pone.0086376.t007

**Table 8.** RM1, Sparkle/RM1, Sparkle/PM7, Sparkle/PM6, Sparkle/PM3, and Sparkle/AM1 unsigned mean errors for specific types of distances for holmium(III) complexes.

| Type of distances   | unsigned mean errors for specific types of distances (Å) |               |             |             |             |             |               |
|---------------------|----------------------------------------------------------|---------------|-------------|-------------|-------------|-------------|---------------|
|                     | N                                                        | RM1           | Sparkle/RM1 | Sparkle/PM7 | Sparkle/PM6 | Sparkle/PM3 | Sparkle/AM1   |
| Ho - Ho             | 4                                                        | <b>0.1301</b> | 0.2083      | 0.2144      | 0.2751      | 0.1958      | 0.2747        |
| Ho - O              | 219                                                      | <b>0.0475</b> | 0.0604      | 0.0554      | 0.1021      | 0.0639      | 0.0557        |
| Ho - N              | 58                                                       | 0.0786        | 0.0696      | 0.1592      | 0.1732      | 0.0585      | <b>0.0469</b> |
| Ho - C              | 98                                                       | <b>0.0752</b> | 0.2256      | 0.4544      | 0.5380      | 0.2537      | 0.2655        |
| Ho - Cl             | 28                                                       | <b>0.0585</b> | 0.3055      | 0.1262      | 0.2777      | 0.2480      | 0.2679        |
| Ho - L              | 407                                                      | <b>0.0602</b> | 0.1198      | 0.1727      | 0.2310      | 0.1228      | 0.1217        |
| L - L'              | 1748                                                     | <b>0.1371</b> | 0.2326      | 0.3289      | 0.3462      | 0.2324      | 0.2585        |
| Ho-L, Ho-Ho and L-L | 2155                                                     | <b>0.1225</b> | 0.2113      | 0.2994      | 0.3245      | 0.2117      | 0.2327        |

doi:10.1371/journal.pone.0086376.t008

**Table 9.** RM1, Sparkle/RM1, Sparkle/PM7, Sparkle/PM6, Sparkle/PM3, and Sparkle/AM1 unsigned mean errors for specific types of distances for erbium complexes.

| Type of distances    | unsigned mean errors for specific types of distances (Å) |               |             |             |             |             |               |
|----------------------|----------------------------------------------------------|---------------|-------------|-------------|-------------|-------------|---------------|
|                      | N                                                        | RM1           | Sparkle/RM1 | Sparkle/PM7 | Sparkle/PM6 | Sparkle/PM3 | Sparkle/AM1   |
| Er - Er              | 6                                                        | <b>0.1200</b> | 0.2639      | 0.5458      | 0.2124      | 0.2439      | 0.2626        |
| Er - O               | 336                                                      | <b>0.0509</b> | 0.0730      | 0.0874      | 0.1285      | 0.0657      | 0.0689        |
| Er - N               | 77                                                       | 0.0594        | 0.0484      | 0.0529      | 0.0846      | 0.0551      | <b>0.0434</b> |
| Er - C               | 96                                                       | <b>0.0318</b> | 0.2004      | 0.4280      | 0.5474      | 0.2277      | 0.2177        |
| Er - S               | 12                                                       | <b>0.1088</b> | 0.4802      | 1.2501      | 0.5234      | 0.5211      | 0.5212        |
| Er - Cl              | 33                                                       | <b>0.0574</b> | 0.3243      | 0.3406      | 0.2753      | 0.2975      | 0.2928        |
| Er - Br              | 3                                                        | <b>0.0463</b> | 0.4526      | 1.5964      | 0.4475      | 0.4146      | 0.4291        |
| Er - L               | 563                                                      | <b>0.0511</b> | 0.1199      | 0.1967      | 0.2136      | 0.1205      | 0.1189        |
| L - L'               | 2259                                                     | <b>0.1575</b> | 0.2197      | 0.2938      | 0.3519      | 0.2076      | 0.2371        |
| Er-L, Er-Er and L-L' | 2822                                                     | <b>0.1363</b> | 0.2000      | 0.2746      | 0.3243      | 0.1904      | 0.2137        |

doi:10.1371/journal.pone.0086376.t009

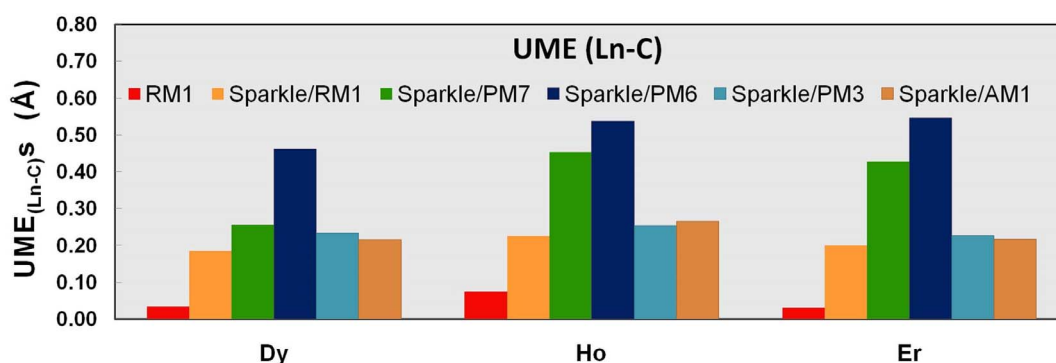**Figure 4.**  $UME_{(Ln-C)}$  obtained using the RM1 model for the lanthanides and all five versions of the Sparkle Model: Sparkle/RM1, Sparkle/PM7, Sparkle/PM6, Sparkle/PM3 and Sparkle/AM1 for all complexes of the universe set for each of the lanthanide trications: Dy(III), Ho(III) and Er(III). The UMEs are calculated as the absolute value of the difference between the experimental and calculated Ln-C interatomic distances, summed up for all complexes, for each of the lanthanides.

doi:10.1371/journal.pone.0086376.g004

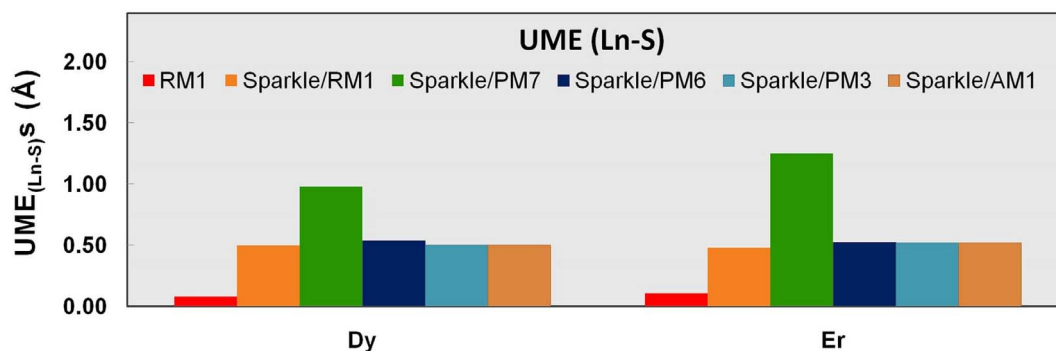**Figure 5.**  $UME_{(Ln-S)}$  obtained using the RM1 model for the lanthanides and all five versions of the Sparkle Model: Sparkle/RM1, Sparkle/PM7, Sparkle/PM6, Sparkle/PM3 and Sparkle/AM1 for all complexes of the universe set for each of the lanthanide trications: Dy(III), Ho(III) and Er(III). The UMEs are calculated as the absolute value of the difference between the experimental and calculated Ln-S interatomic distances, summed up for all complexes, for each of the lanthanides. There are no Ho-S distances in the universe of Ho(III) complexes considered.

doi:10.1371/journal.pone.0086376.g005

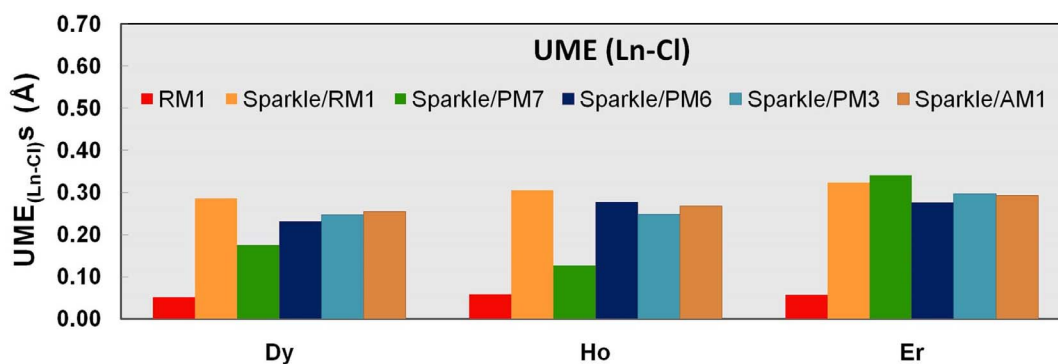

**Figure 6.**  $UME_{(Ln-Cl)}$ s obtained using the RM1 model for the lanthanides and all five versions of the Sparkle Model: Sparkle/RM1, Sparkle/PM7, Sparkle/PM6, Sparkle/PM3 and Sparkle/AM1 for all complexes of the universe set for each of the lanthanide trications: Dy(III), Ho(III) and Er(III). The UMEs are calculated as the absolute value of the difference between the experimental and calculated Ln-Cl interatomic distances, summed up for all complexes, for each of the lanthanides.  
doi:10.1371/journal.pone.0086376.g006

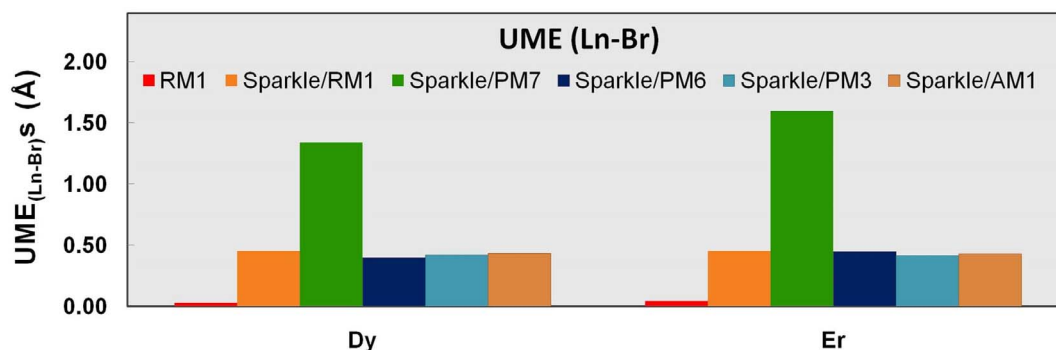

**Figure 7.**  $UME_{(Ln-Br)}$ s obtained using the RM1 model for the lanthanides and all five versions of the Sparkle Model: Sparkle/RM1, Sparkle/PM7, Sparkle/PM6, Sparkle/PM3 and Sparkle/AM1 for all complexes of the universe set for each of the lanthanide trications: Dy(III), Ho(III) and Er(III). The UMEs are calculated as the absolute value of the difference between the experimental and calculated Ln-Br interatomic distances, summed up for all complexes, for each of the lanthanides. The RM1 model for lanthanides  $UME_{(Ln-Br)}$  bars are very small. Besides, there are no Ho-Br distances in the universe of Ho(III) complexes considered.  
doi:10.1371/journal.pone.0086376.g007

Er(III). Tables 7–9 and Figures 1–3 show UMEs for all types of Ln-L distances present in the universe of Ln(III) complexes, together with the corresponding values from the previous sparkle models for comparison. It must be noted, though, that in the original sparkle model articles, we only included complexes with exclusively Ln-O and Ln-N bonds. But, in the present article, we

are considering a much larger set of complexes with other types of bonds such as Ln-C, Ln-Cl, etc. Indeed, here we now may have complexes which have not only Ln-O and/or Ln-N bonds, but also other types of bonds, such as Ln-C bonds, all in the same compound. Of course, these were not included as test cases for the previous Sparkle models, but are here taken in full consideration.

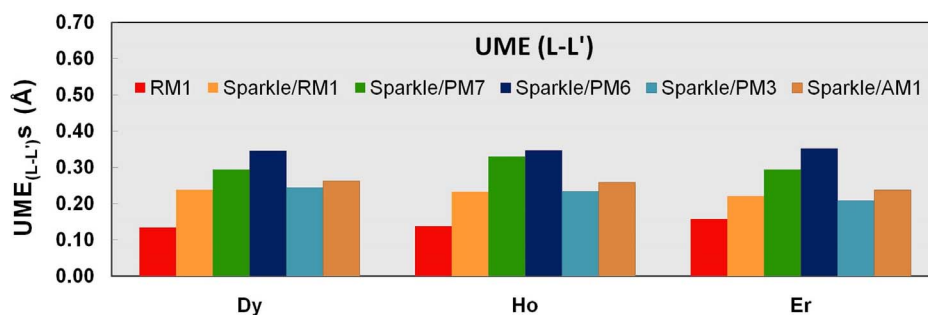

**Figure 8.**  $UME_{(L-L')}$ s obtained using the RM1 model for the lanthanides and all five versions of the Sparkle Model: Sparkle/RM1, Sparkle/PM7, Sparkle/PM6, Sparkle/PM3 and Sparkle/AM1 for all complexes of the universe set for each of the lanthanide trications: Dy(III), Ho(III) and Er(III). The UMEs are calculated as the absolute value of the difference between the experimental and calculated interatomic distances between the coordinated atoms, L-L', summed up for all complexes, for each of the lanthanides.  
doi:10.1371/journal.pone.0086376.g008



And that is the reason why UMEs for the Ln-O and Ln-N types of bonds in the present article tend to be different, slightly larger, when set side by side to similar Ln-O and Ln-N UMEs of the original sparkle model articles. However, not to unnecessarily crowd the present article, in the tables, we only show numbers computed using the old models, but for the new test set.

Dy-Dy distances in dilanthanide complexes of Dy (III), Ho (III), and Er (III) lie in the range from 3.6 Å to 6.6 Å, while lanthanide-other ligand atom distances lie on average around 2.5 Å. That is why Ln-Ln UMEs are larger than other Ln-L UMEs. The previous Sparkle Models focused on these Ln-Ln, a also on Ln-O, and Ln-N distances only. Indeed, considering only Dy complexes (Table 7), there are 404 distances of these types, which represent 53% of all distances involving Dy(III) in its universe of complexes. The next most important types are Dy(III)-C distances, for which there are 315 of them making up 41% of the total.

By examining Table 7 and Figure 4, we can see a significant improvement in these next types of distances, with UME<sub>(Dy-C)</sub>s for the RM1 model for the lanthanides being 0.03 Å, whereas the corresponding average value of the sparkle models is 0.27 Å, a value 9 times larger. That alone would justify the introduction of the RM1 model for the lanthanides because, in the case of dysprosium, almost half the extant Ln-L distances are significantly more accurately described by RM1.

The situation is less dramatic but still significant for the other trications being parameterized, when Ln-C distances represent 24% of the total for Ho(III), and 17% for Er(III). The RM1 model for the lanthanides is even further justified when we compare other types of less common distances like Ln-S, Ln-Cl, and Ln-Br, because it outperforms all previous sparkle models as shown in Tables 7–9 and Figures 5–7. In all these instances, the RM1 UMEs tend to be almost ten times smaller than the corresponding errors of all previous sparkle models.

Finally, we can have an idea of the accuracy of the angles by examining the distances between any two atoms of the coordination polyhedron, the L-L' distances. For all three lanthanide trications, there was a significant reduction of these UMEs by a factor of two when compared to the corresponding UMEs for the previous sparkle models: from 0.26 Å to 0.13 Å, as can be inferred from Figure 8. This is indirect evidence that the angles are much better predicted in the RM1 model for the lanthanides.

## Conclusions

The RM1 model for the lanthanides represents a significant improvement in the theoretical semiempirical modeling of

lanthanide complexes, which started with the sparkle model in 1994 [18,19] which and attained maturity with the introduction of Sparkle/AM1 in 2005 [23], and was extended to Sparkle/PM3 [31,32], Sparkle/PM6 [33], to Sparkle/PM7 [34] and up to Sparkle/RM1 [35], the last two in 2013.

There is, however, a cost associated with the improvement. The RM1 model for the lanthanides adds nine more orbitals per lanthanide to the calculation, whereas all sparkle models add none. Thus, for a single SCF calculation of a complex of about 60 atoms, for example, an RM1 model for the lanthanides calculation takes about twice the computing time of a Sparkle/RM1 calculation. Such cost can become even weightier if the molecular structure contains more than one lanthanide ion, as is usually the case of metal-organic frameworks. Since the performance of both Sparkle/RM1 and RM1 model for the lanthanides is essentially equivalent for Ln-Ln, Ln-O, and Ln-N, the user may still benefit from the speed of the sparkle models if the structure of interest contains only these types of bonds, as it takes place in the majority of cases.

In conclusion, via the introduction of a set of 5 d, 6 s, and 6 p semiempirical atomic orbitals, the RM1 model for the lanthanides thus extends the Sparkle Models' capabilities of correctly describing Ln-Ln, Ln-O, and Ln-N distances, to other types of distances, such as Ln-C, Ln-S, Ln-P, Ln-Cl, and Ln-Br, while simultaneously improving the coordinating bond angles.

## Supporting Information

**File S1 Instructions on how to run the RM1 model for the lanthanides in MOPAC12 [45], and MOPAC sample input and output files for complexes of Dy(III), Ho(III), and Er(III).**  
(DOC)

## Acknowledgments

We gratefully acknowledge the Cambridge Crystallographic Data Centre for the Cambridge Structural Database.

## Author Contributions

Conceived and designed the experiments: ROF GBR AMS. Performed the experiments: MAMF JDLD ROF. Analyzed the data: MAMF JDLD ROF. Wrote the paper: AMS ROF. Coded the model into MOPAC: GBR. Conceived the parameterization techniques: AMS GBR ROF. Conceived the sampling of the reference structures and the statistical validation of the model: AMS.

## References

- Ishikawa N, Sugita M, Ishikawa T, Koshihara S, Kaizu Y (2003) Lanthanide Double-Decker Complexes Functioning as Magnets at the Single-Molecular Level. *Journal of the American Chemical Society* 125: 8694–8695.
- Zhang P, Guo Y-N, Tang J (2013) Recent advances in dysprosium-based single molecule magnets: Structural overview and synthetic strategies. *Coordination Chemistry Reviews* 257: 1728–1763.
- Ishikawa N, Mizuno Y, Takamatsu S, Ishikawa T., Koshihara S-Y (2008) Effects of chemically induced contraction of a coordination polyhedron on the dynamical magnetism bis(phthalocyaninato)dysprosium, a single-4f-ionic single-molecule magnet with a Kramers ground state. *Inorganic Chemistry* 47: 10217–10219.
- AlDamen MA, Cardona-Serra S, Clemente-Juan JM, Coronado E, Gaita-Ariño A, et al. (2009) Mononuclear lanthanide single molecule magnets based on the polyoxometalates [Ln(W<sub>5</sub>O<sub>18</sub>)<sub>2</sub>]<sup>9−</sup> and [Ln(β<sub>2</sub>-SiW<sub>11</sub>O<sub>39</sub>)<sub>2</sub>]<sup>13−</sup> (Ln<sup>III</sup> = Tb, Dy, Ho, Er, Tm, and Yb). *Inorganic Chemistry* 48: 3467–3479.
- Lin P-H, Burchell TJ, Ungur L, Chibotaru LF, Wernsdorfer W, et al. (2009) A polynuclear lanthanide single-molecule magnet with a record anisotropic barrier. *Angewandte Chemie International Edition* 48: 9489–9492.
- Rinehart JD, Fang M, Evans WJ, Long JR (2011) Strong exchange and magnetic blocking in N<sub>2</sub> 32-radical-bridged lanthanide complexes. *Nature Chemistry* 3: 538–542.
- Norek M, Peters JA (2011) MRI contrast agents based on dysprosium or holmium. *Progress in Nuclear Magnetic Resonance Spectroscopy* 59: 64–82.
- Nilsson S, Wikström G, Ericsson A, Wikström M, Öksendal A, et al. (1996) Double-contrast MR imaging of reperfused porcine myocardial infarction. An experimental study using Gd-DTAA and Dy-DTPA-BMA. *Acta Radiologica* 37: 27–35.
- Wikström M (1992) MR imaging of experimental myocardial infarction. *Acta radiologica. Supplementum* 379: 1–30.
- Bayouth JE, Macey DJ, Kasi LP, Garlich JR, McMillan K, et al. (1995) Pharmacokinetics, dosimetry and toxicity of Holmium-166-DOTMP for bone marrow ablation in multiple myeloma. *Journal of Nuclear Medicine* 36: 730–737.
- Sun L-N, Zhang H-J, Fu L-S, Liu F-Y, Meng Q-G, et al. (2005) A New Sol-Gel Aterial Doped with an Erbium Complex and Its Potential optical-Amplification Application. *Advanced Functional Materials* 15: 1041–1048.
- Park OH, Seo SY, Jung JI, Bae JY (2003) Photoluminescence of mesoporous silica films impregnated with an erbium complex. *Journal of Materials Research* 18: 1039–1042.
- Peter E (2003) Cheminformatics Analysis of Organic Substituents: Identification of the Most Common Substituents, Calculation of Substituent Properties, and

- Automatic Identification of Drug-like Bioisosteric Groups. *Journal of Chemical Information and Computer Sciences* 43: 374–380.
14. Dolg M, Cao X (2012) Relativistic Pseudopotentials: Their Development and Scope of Applications. *Chemical Reviews* 112: 403–480.
  15. Dolg M, Stoll H, Preuss H (1989) Energy-adjusted Abinitio Pseudopotentials for the Rare-earth Elements. *Journal of Chemical Physics* 90: 1730–1734.
  16. Dolg M, Stoll H, Savin A, Preuss H (1989) Energy-Adjusted Pseudopotentials for the Rare-earth Elements. *Theoretica Chimica Acta* 75: 173–194.
  17. Freire RO, Rocha GB, Simas AM (2006) Lanthanide Complex Coordination Polyhedron Geometry Prediction Accuracies of Ab initio Effective Core Potential Calculations. *Journal of Molecular Modeling* 12: 373–389.
  18. de Andrade AVM, da Costa Jr NB, Simas AM, de Sá GF (1994) Sparkle model for the quantum chemical AM1 calculation of europium complexes. *Chemical Physics Letters* 227: 349–353.
  19. de Andrade AVM, da Costa Jr NB, Simas AM, de Sá GF (1995) Sparkle model for the quantum chemical AM1 calculation of europium complexes of coordination number nine. *Journal of Alloys and Compounds* 225: 55–59.
  20. Dewar MJS, Ziegler EG, Healy EF, Stewart JJP (1985) AM1: A New General Purpose Quantum Mechanical Molecular Model. *Journal of the American Chemical Society* 107: 3902–3909.
  21. Andrade AVM, Longo RL, Simas AM, de Sá GF (1996) Theoretical Model for the Prediction of Electronic Spectra of Lanthanide Complexes. *Journal of the Chemical Society Faraday Transactions* 92: 1835–1839.
  22. Rocha GB, Freire RO, da Costa NB, de Sa, GF, Simas AM (2004) Sparkle Model for AM1 Calculation of Lanthanide Complexes: Improved Parameters for Europium. *Inorganic Chemistry* 43: 2346–2354.
  23. Freire RO, Rocha GB, Simas AM (2005) Sparkle Model for the Calculation of Lanthanide Complexes: AM1 Parameters for Eu(III), Gd(III), and Tb(III). *Inorganic Chemistry* 44: 3299–3310.
  24. da Costa NB, Freire RO, Rocha GB, Simas AM (2005) Sparkle Model for the AM1 Calculation of Dysprosium (III) Complexes. *Inorganic Chemistry Communication* 8: 831–835.
  25. da Costa NB, Freire RO, Rocha GB, Simas AM (2005) Sparkle/AM1 Modeling of Holmium (III) Complexes. *Polyhedron* 24: 3046–3051.
  26. Freire RO, do Monte EV, Rocha GB, Simas AM (2006) AM1 Sparkle Modeling of Er(III) and Ce(III) Coordination Compounds. *Journal of Organometallic Chemistry* 691: 2584–2588.
  27. Stewart JJP (2007) MOPAC2007, Stewart Computational Chemistry: Colorado Springs, USA.
  28. Faustino WM, Rocha GB, Silva FRGE, Malta OL, de Sá GF, et al. (2000) Design of Ligands to Obtain Lanthanide Ion Complexes Displaying High Quantum Efficiencies of Luminescence using the Sparkle Model. *Journal of Molecular Structure - Theochem* 527: 245–251.
  29. Freire RO, Rocha GB, Albuquerque RQ, Simas AM (2005) Efficacy of the Semiempirical Sparkle Model as Compared to ECP Ab-initio Calculations for the Prediction of Ligand Field Parameters of Europium(III) Complexes. *Journal of Luminescence* 111: 81–87.
  30. Faustino WM, Malta OL, Teotonio EES, Brito HF, Simas AM, et al. (2006) The Journal of Physical Chemistry A 110: 2510–2516.
  31. Simas AM, Freire RO, Rocha GB (2008) Lanthanide Coordination Compounds Modeling: Sparkle/PM3 Parameters for Dysprosium (III), Holmium (III) and Erbium (III). *Journal of Organometallic Chemistry* 693: 1952–1956.
  32. Freire RO, Rocha GB, Simas AM (2009) Sparkle/PM3 for the Modeling of Europium(III), Gadolinium(III), and Terbium(III) Complexes. *Journal of the Brazilian Chemical Society* 20: 1638–1645.
  33. Freire RO, Simas AM (2010) Sparkle/PM6 Parameters for all Lanthanide Trications from La(III) to Lu(III). *Journal of Chemical Theory and Computation* 6: 2019–2023.
  34. Dutra JDL, Filho MAM, Rocha GB, Freire RO, Simas AM, et al. (2013) Sparkle/PM7 Lanthanide Parameters for the Modeling of Complexes and Materials. *Journal of Chemical Theory and Computation* 9: 3333–3341.
  35. Filho MAM, Dutra JDL, Rocha GB, Freire RO, Simas AM (2013) Sparkle/RM1 parameters for the semiempirical quantum chemical calculation of lanthanide complexes. *RSC Advances* 3: 16747–16755.
  36. Rocha GB, Freire RO, Simas AM, Stewart JJP (2006) RM1: A Reparameterization of AM1 for H, C, N, O, P, S, F, Cl, Br, and I. *Journal of Computational Chemistry* 27: 1101–1111.
  37. Allen FH (2002) The Cambridge Structural Database: A Quarter of a Million Crystal Structures and Rising. *Acta Crystallographica Section B* 58: 380–388.
  38. Orpen G (2002) Applications of the Cambridge Structural Database to Molecular Inorganic Chemistry. *Acta Crystallographica Section B* 58: 398–406.
  39. Allen FH, Motherwell WDS (2002) Applications of the Cambridge Structural Database in Organic Chemistry and Crystal Chemistry. *Acta Crystallographica Section B* 58: 407–422.
  40. Kaufman L, Rousseeuw PJ (2009) Finding Groups in Data: An Introduction to Cluster Analysis, Eds. John Wiley & Sons: New Jersey.
  41. Tsallis C (1988) Possible generalization of Boltzmann-Gibbs statistics. *Journal of Statistical Physics* 52: 479–487.
  42. Freire RO, Rocha GB, Simas AM (2005) Modeling Lanthanide Complexes: Sparkle/AM1 Parameters for Ytterbium (III). *Journal of Computational Chemistry* 26: 1524–1528.
  43. Freire RO, Rocha GB, Simas AM (2006) Modeling Rare Earth Complexes: Sparkle/PM3 Parameters for Thulium(III). *Chemical Physics Letters* 425: 138–141.
  44. Conover WJ (1999) Statistics of the Kolmogorov-Smirnov type. In *Practical nonparametric statistics*, 3rd ed.; Wiley, B., II, Ed.; John Wiley & Sons: New York, U.S.A 428–473.
  45. Stewart JJP (2012) MOPAC2012, Stewart Computational Chemistry, Colorado Springs, CO, USA. Available: <http://OpenMOPAC.net>. Accessed 2010 Oct 6.
